# Supplementary material for: Establishment and Characterization of a Cell Line (S-RMS1) Derived from an Infantile Spindle Cell Rhabdomyosarcoma with SRF-NCOA2 Fusion Transcript
Source: MDPI journal article supplement (doi:10.3390/ijms22115484), 2021-05-22
Supplement: s1 [file s1]

A

>sp|P11831|SRF\_HUMAN Serum response factor  
MLPTQAGAAAAALGRGSALGGSALNRTPTGRPGGGGGTRGANGRRVPGNAGLGPGRLE  
AAAAATTPAPTAGALYSGSEGDSESGEEELGAERRGLKRSLSMEIGMVVGGPEASAAA  
TGGYGPVSGAVS**GAKPGKKT****GRGVKIRMEFIDNKLRRYTFESKKKIGIMKRAYELSLITG**  
**IQVLLLVASETGHVYTFATRLQPMITSETGKALIQTCNLNSP**DSPPRSDPTTDQRMATG  
FEETDLTYQVSESDSSGETKDTLKPAFTVTNLPGTTSTIQAPSTSTTMQVSSGSPFIT  
NYLAPVSAVSVPASVANGTTLKSTGSGPVSSGGLMQLPSTFTLMPGGAVAQVVPQAI  
QVHQAPQASPSRDSSTDLTQTSSTGTVTLPATIMTSSVPTTVGGHMYPSPHAVMYAPT  
SGLDGSGLTVLNAFSQAPSTMQVSHSQVQEPGGVPQVFLTASSGTQVIP**VS****AVQLHQ**MAV  
IGQAGSSSNLTQLQVNLDTAHSTKSE

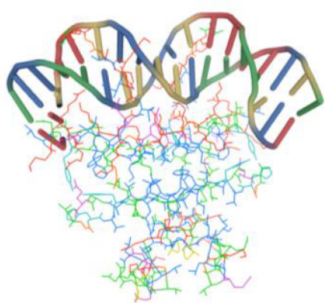

B

>sp|Q15596|NCOA2\_HUMAN Nuclear receptor coactivator 2  
MSGMGENTSDPSRAETRRKKECPDQ**LGSPKPRNTEKRNREQENKYIEELAEILFANFNDI**  
**DNFNFKPKDKAILKETVKQIRG**IKKEQEKAAAAANIDEVQKSDVSSTGQGVIDKDALGPM**IT**  
**EALDGFFFFVNLGNVVFVSENVTOYLRYNQOELMKNKSVSYLLHVGHDHTEFVKNLLPRSI**  
**VNG**GSWSGEPFRRNSHTFNCRLMLVKPLPDSEEEGHNDQEAHQYETMQCFVAVSQPKSIKE  
EGEDLQSLCICVARRVPMKERPVLPSSSEFTTRQDLQGGKITSLDSTMTMAAMKPGWEDLV  
RRCIQKFHAQHEGESVSYAKRRHHHEVLROGLAFSQIYRFSLSDGTLVAAQTKSKLIRSQT  
TNEPQLVISLHMLHREONVCMNPDLTGQTMGKPLNPISNSPAHQALCSGNPGQDMTSL  
SNINFPINGPKQMGMPMGRFGSGGMNVHSGMQATTPQGSNYALKMNSPSSQSPGMNPG  
QPTSMLSPRHRMSPGVAGSPRIPPSQFSPAGSLHSPVGVCSSTGNSSHYSYTNSSNALQAL  
SEGHGVSLSGSSLASPDLMGNLQNSPVNMNPPPLSKMGLSDSKDCFLYGEPESETTGQA  
ESSCHPEQGEKTNPNLPPAVSSERADGQSRHLHDSKGQTKLLQLLTCKSDQMEPSPLASS  
LSDTNKDSGSLPGSGSTHGTSLKEKHILHRLLDQSSSPVDLAKLTAEATGKDLSDQESS  
STAPGSEVTIKQEPVSPKKKENALLRYLLDKDDTKDIGLPEITPKLERLDSKTDPAANTK  
LIAMKTEKEEMSEFEPGDQ**PGSELDN**LEEILDDLQNSQLPQLFPDTRPGAPAGSVQKAI  
INDLMQLTAENSPTVPVGAQKTALRISQSTFNNRPQGLRLLPNQNLPLDITLQSPGTGAG  
PFPPIRNSSPYSVIPPQGMGNQGMIGNQNLGNSSTGMIGNSASRPTMPSGEWAPQSSA  
VRVTCATTSAMNRPVQGGMIRNPAASIPMRPSSSQPGQRTLQSQVMNIGPSELEMMNGG  
PQYSQQQAPPNQTAWPESILPIDQASFASQNRQPFSSPDDLCPHAAESPDEGALL  
DQLYLALRNFDGLEEIDRALGIPELVSQSAVDPEQFSSQSDSNIMLEQKAPVFPQQYASQ  
AQMAQGSYSPMQDPNFHTMGQRPSYATLRMQPRPGLRPTGLVQNPQNLRLQLQHLRLQAA  
QNRQPLMNQISNVSNVNLTLRPGVPTQAPINAQMLAQQRQREILNQHLRQRQMHQQQQVQ  
RTLMMRGQGLNMTPSMVAPSGMPATMSNPRIQANAAQFPFPFNYSISQQPDGFTGATT  
PQSPLMSPRMAHTQSPMMQQSQANPAYQAPSDINGWAQNMGGNSMFSQSSPHFGQQAN  
TSMYSNNMNIIVSMATNTGMSMGMQMTGQISMTSVTSVPTSGLSSMGPEQVNDPALRG  
NLFNPQLPGMDMIKQEGDTRKYC

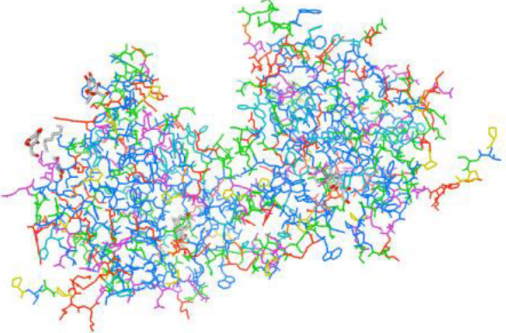

C

SRF-NCOA2

MLPTQAGAAAAALGRGSALGGSALNRTPTGRPGGGGGTRGANGRRVPGNAGLGPGRLE  
AAAAATTPAPTAGALYSGSEGDSESGEEELGAERRGLKRSLSMEIGMVVGGPEASAAA  
TGGYGPVSGAVS**GAKPGKKT****GRGVKIRMEFIDNKLRRYTFESKKKIGIMKRAYELSLITG**  
**IQVLLLVASETGHVYTFATRLQPMITSETGKALIQTCNLNSP**DSPPRSDPTTDQRMATG  
FEETDLTYQVSESDSSGETKDTLKPAFTVTNLPGTTSTIQAPSTSTTMQVSSGSPFIT  
NYLAPVSAVSVPASVANGTTLKSTGSGPVSSGGLMQLPSTFTLMPGGAVAQVVPQAI  
QVHQAPQASPSRDSSTDLTQTSSTGTVTLPATIMTSSVPTTVGGHMYPSPHAVMYAPT  
SGLDGSGLTVLNAFSQAPSTMQVSHSQVQEPGGVPQVFLTASSGTQVIP**VS****AVQLHQPGS**  
**ELDN**LEEILDDLQNSQLPQLFPDTRPGAPAGSVQKAIINDLMQLTAENSPTVPVGAQKT  
ALRISQSTFNNRPQGLRLLPNQNLPLDITLQSPGTGAGPFPPIRNSSPYSVIPPQGMGN  
NQGMIGNQNLGNSSTGMIGNSASRPTMPSGEWAPQSSAVRVTCATTSAMNRPVQGGMI  
RNPAASIPMRPSSSQPGQRTLQSQVMNIGPSELEMMNGGQYQQQAPPNQTAWPESIL  
PIDQASFASQNRQPFSSPDDLCPHAAESPDEGALLDQLYLALRNFDGLEEIDRALG  
IPELVSQSAVDPEQFSSQSDSNIMLEQKAPVFPQQYASQAQMAQGSYSPMQDPNFHTMGQ  
RPSYATLRMQPRPGLRPTGLVQNPQNLRLQLQHLRLQAAQNRQPLMNQISNVSNVNLTLR  
PGVPTQAPINAQMLAQQRQREILNQHLRQRQMHQQQQVQRTLMMRGQGLNMTPSMVAPSG  
MPATMSNPRIQANAAQFPFPFNYSISQQPDGFTGATTQPSPLMSPRMAHTQSPMMQQS  
QANPAYQAPSDINGWAQNMGGNSMFSQSSPHFGQQANTSMYSNNMNIIVSMATNTGGM  
SSMNQMTGQISMTSVTSVPTSGLSSMGPEQVNDPALRGGLNLFNPQLPGMDMIKQEGDTR  
KYC

**Figure S1:** FASTA sequences of SRF (A), NCOA2 (B) downloaded from <https://www.uniprot.org/> and the respective three-dimensional structures obtained starting from the FASTA sequences with the use <https://swissmodel.expasy.org/interactive/S4rVBg/models/>. (C) Amino acid sequence of the SRF-NCOA2 fusion protein obtained by joining the two parts of the sequences at the breaking point. The functional domains of each protein were highlighted: MADS-Box (red), DNA-binding (yellow), bHLH-domain (pink), FAS-domain (green), breackpoint (light blue).

# Variants by Chromosome

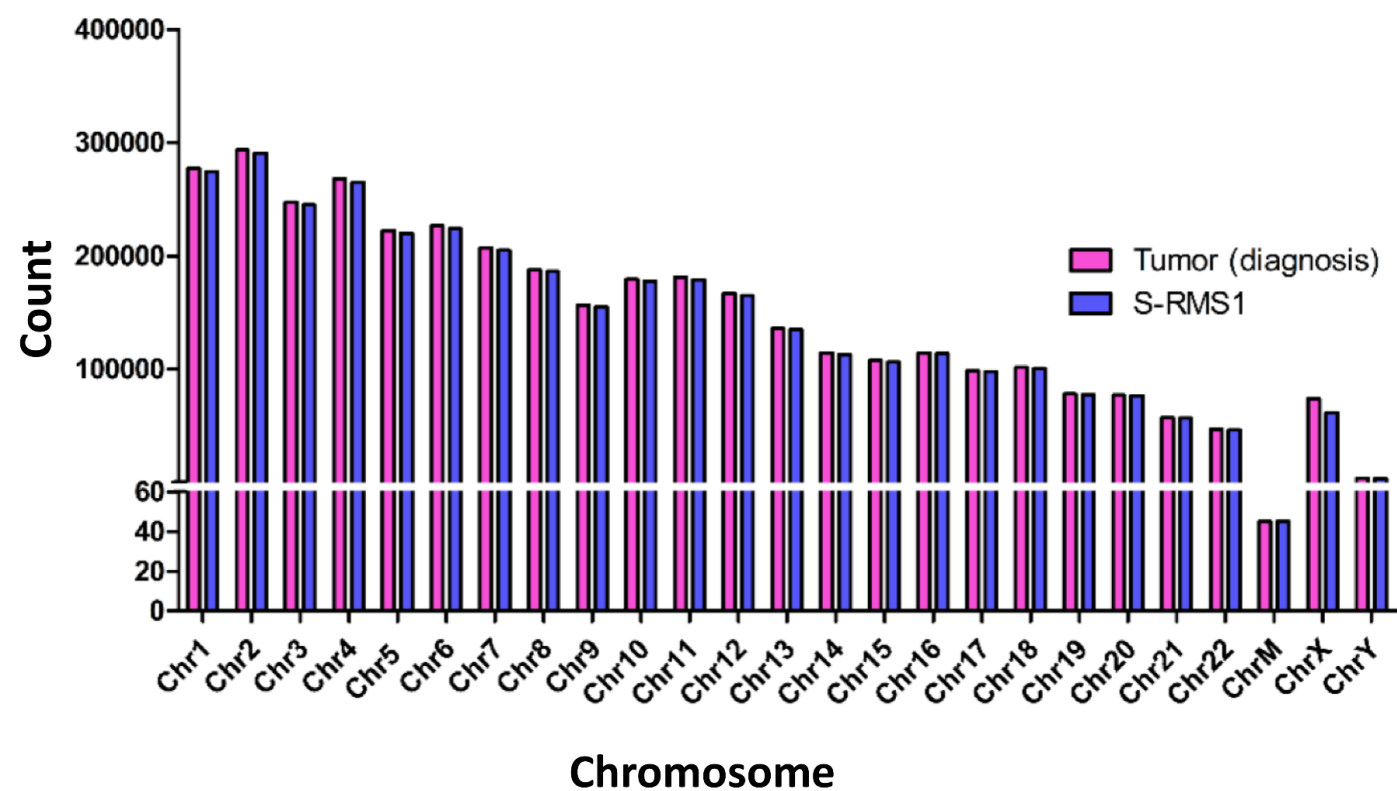

**Figure S2:** The histogram depicts the number of variant counts in each chromosomes of patient genome for tumor at diagnosis (pink bars) and S-RMS1 (blue bars) samples.

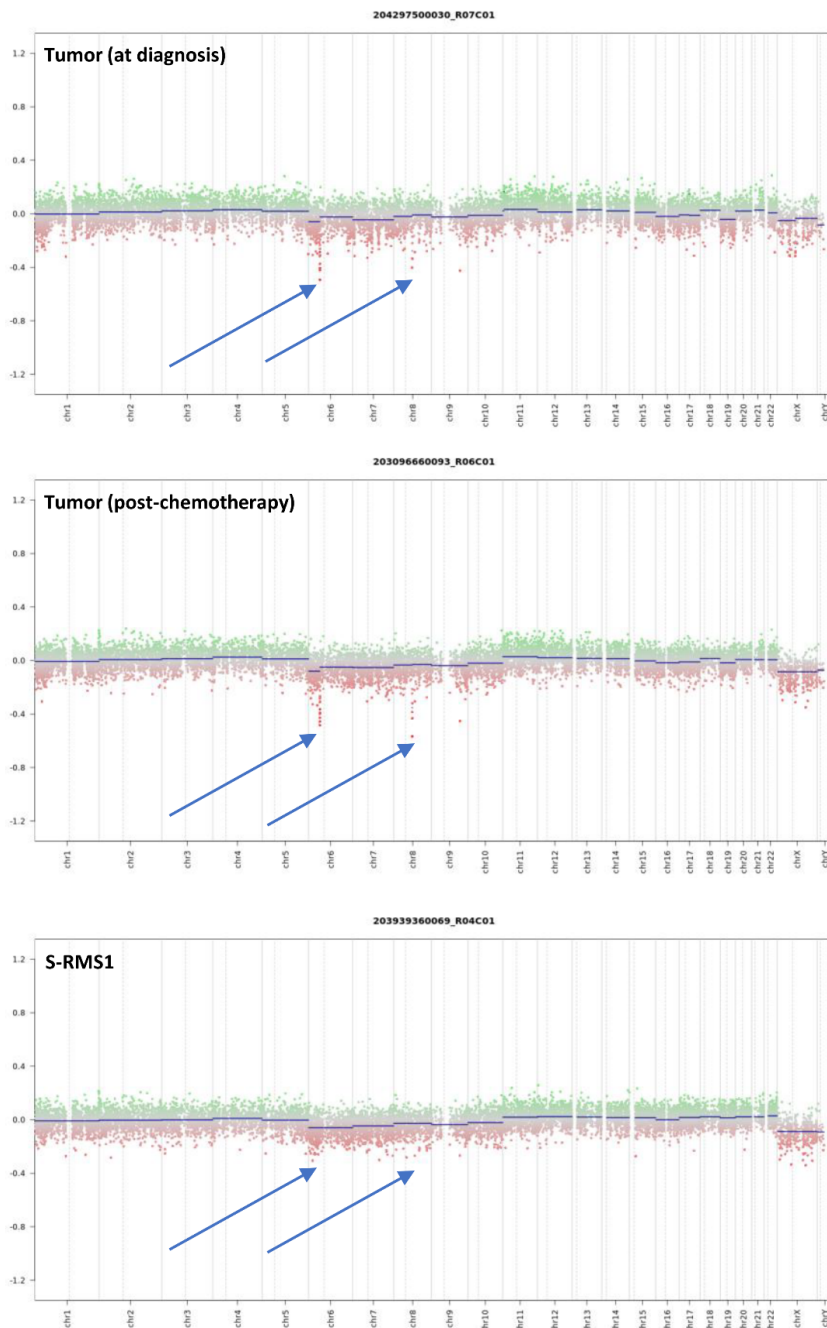

**Figure S3:** Copy number variation plot calculated from DNA methylation array data of the indicated tumor samples and cell line (S-RMS1). Depiction of structural rearrangements involving autosomes and X/Y chromosomes. Gains/amplifications represent positive (green), losses negative (red) deviations from the baseline. Blue arrows highlight chromosome 6p and 8q deletion corresponding to the breakpoints of SRF and NCOA2 respectively.

## Tumor (at diagnosis)

ALMO\_MPC

ASPS

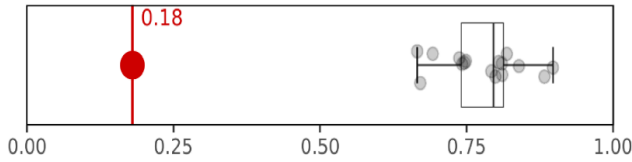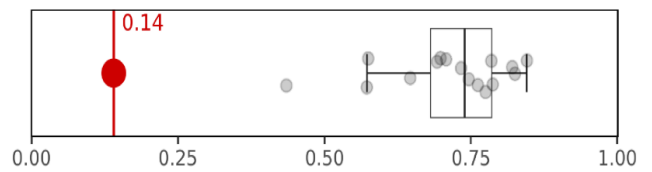

203096660093\_R06C01 (red) reference cases (grey)

203096660093\_R06C01 (red) reference cases (grey)

## Tumor (postchemotherapy)

ALMO\_MPC

ASPS

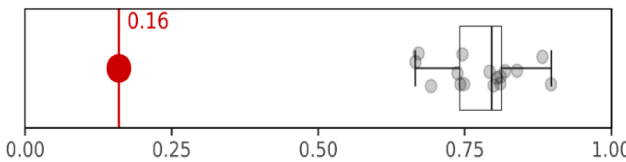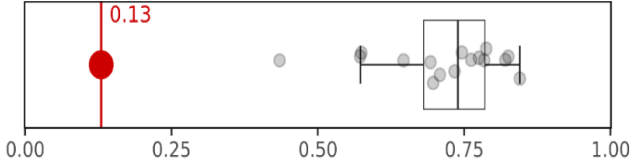

204297500030\_R07C01 (red) reference cases (grey)

204297500030\_R07C01 (red) reference cases (grey)

## S-RMS1

ASPS

RMS\_EMB

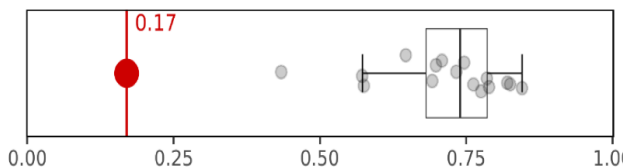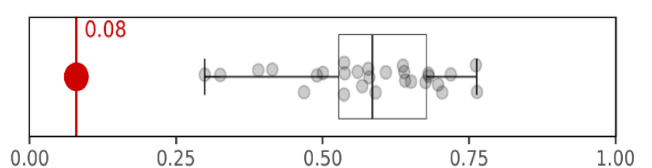

203939360069\_R04C01 (red) reference cases (grey)

203939360069\_R04C01 (red) reference cases (grey)

**Figure S4:** Box-and-whisker plots depicting the first and the second highest raw classification scores (red dot) of the tumor samples and cell line in the indicated methylation classes according to Sarcoma Classifier v12.2 (<https://www.molecularneuropathology.org/mnp/classifier/9>). Grey dots represent the reference cases in the methylation class. ALMO\_MPC angioleiomyoma / myopericytoma; ASPS alveolar soft part sarcoma; RMS\_EMB rhabdomyosarcoma, embryonal
